# Supplementary material for: Does This Look Infected? Hidden Host Plant Infection by the Pathogen Botrytis cinerea Alters Interactions between Plants, Aphids and Their Natural Enemies in the Field
Source: MDPI journal article supplement (doi:10.3390/insects15050347), 2024-05-12
Supplement: s1 [file s1]

## SUPPLEMENTARY

Supplementary table S1: Network level statistics for Tom Thumb in the sentinel experiment, comparing observed values to the 95% confidence limits from the null model and including the standardised effect size (SES).

| <b>Insect guild</b> | <b>Metric</b>        | <b>observed</b> | <b>Null</b> | <b>Lower.CL</b> | <b>Upper.CL</b> | <b>Test</b> | <b>SES</b> |
|---------------------|----------------------|-----------------|-------------|-----------------|-----------------|-------------|------------|
| Aphids              | Weighted nestedness  | -0.643          | -0.373      | -0.432          | -0.307          | Lower       | -7.248     |
|                     | Linkage density      | 2.706           | 3.040       | 3.035           | 3.044           | Lower       | -103.743   |
|                     | Weighted connectance | 0.338           | 0.380       | 0.379           | 0.380           | Lower       | -103.743   |
|                     | Interaction evenness | 0.723           | 0.817       | 0.816           | 0.819           | Higher      | -114.169   |
| Parasitoids         | Weighted nestedness  | -0.005          | -0.834      | -0.950          | -0.735          | Higher      | 11.991     |
|                     | Linkage density      | 3.772           | 4.330       | 4.258           | 4.372           | Lower       | -15.171    |
|                     | Weighted connectance | 0.377           | 0.433       | 0.425           | 0.437           | Lower       | -15.171    |
|                     | Interaction evenness | 0.775           | 0.922       | 0.910           | 0.929           | Lower       | -23.15     |
| Predators           | Weighted nestedness  | 0.736           | 0.300       | -0.071          | 0.621           | Higher      | 1.886      |
|                     | Linkage density      | 3.966           | 4.398       | 4.210           | 4.592           | Lower       | -3.577     |
|                     | Weighted connectance | 0.360           | 0.399       | 0.382           | 0.417           | Lower       | -3.577     |
|                     | Interaction evenness | 0.902           | 0.930       | 0.914           | 0.945           | Lower       | -2.368     |

Supplementary table S2: Network-level statistics for Little Gem in the sentinel experiment, comparing observed values to the 95% confidence limits from the null model and including the standardised effect size (SES).

| <b>Insect guild</b> | <b>Metric</b>        | <b>observed</b> | <b>Null</b> | <b>Lower.CL</b> | <b>Upper.CL</b> | <b>Test</b> | <b>SES</b> |
|---------------------|----------------------|-----------------|-------------|-----------------|-----------------|-------------|------------|
| Aphids              | Weighted nestedness  | 0.323           | -0.310      | 0.428           | 0.189           | Higher      | 2.775      |
|                     | Linkage density      | 2.468           | 2.742       | 2.734           | 2.747           | Lower       | -57.652    |
|                     | Weighted connectance | 0.308           | 0.342       | 0.341           | 0.3434          | Lower       | -57.652    |
|                     | Interaction evenness | 0.773           | 0.745       | 0.741           | 0.758           | Higher      | 4.638      |
| Parasitoids         | Weighted nestedness  | 0.317           | -0.189      | -0.644          | 0.295           | Higher      | 1.254      |
|                     | Linkage density      | 3.751           | 4.093       | 3.931           | 4.166           | Lower       | -4.417     |
|                     | Weighted connectance | 0.375           | 0.409       | 0.393           | 0.416           | Lower       | -4.417     |
|                     | Interaction evenness | 0.852           | 0.893       | 0.871           | 0.908           | Lower       | -3.58      |
| Predators           | Weighted nestedness  | 0.414           | 0.458       | -0.231          | 0.846           | ns          | -0.126     |
|                     | Linkage density      | 3.500           | 4.206       | 3.799           | 4.556           | Lower       | -2.736     |
|                     | Weighted connectance | 0.318           | 0.382       | 0.345           | 0.414           | Lower       | -2.736     |
|                     | Interaction evenness | 0.905           | 0.950       | 0.931           | 0.963           | Lower       | -4.179     |

Supplementary Table S3: Network-level statistics for Tom Thumb plants in the established aphid colony experiment, comparing observed values to the 95% confidence limits from the null model and including the standardised effect size (SES).

| Insect guild | Metric               | observed | Null   | Lower.CL | Upper.CL | Test   | SES    |
|--------------|----------------------|----------|--------|----------|----------|--------|--------|
| Parasitoids  | Weighted nestedness  | 0.472    | -0.56  | -0.356   | 0.154    | Higher | 3.266  |
|              | Linkage density      | 3.136    | 3.465  | 3.337    | 3.555    | Lower  | -4.547 |
|              | Weighted connectance | 0.392    | 0.433  | 0.417    | 0.444    | Lower  | -4.547 |
|              | Interaction evenness | 0.902    | 0.908  | 0.877    | 0.927    | ns     | -0.403 |
| Predators    | Weighted nestedness  | 0.161    | -0.010 | -0.385   | 0.213    | ns     | 0.803  |
|              | Linkage density      | 3.237    | 3.622  | 3.518    | 3.714    | Lower  | -5.275 |
|              | Weighted connectance | 0.404    | 0.452  | 0.439    | 0.464    | Lower  | -5.275 |
|              | Interaction evenness | 0.901    | 0.938  | 0.918    | 0.956    | Lower  | -2.830 |

Supplementary Table S4: Network-level statistics for Little Gem plants in the established aphid colony experiment, comparing observed values to the 95% confidence limits from the null model and including the standardised effect size (SES).

| Insect guild | Metric               | observed | Null   | Lower.CL | Upper.CL | Test   | SES    |
|--------------|----------------------|----------|--------|----------|----------|--------|--------|
| Parasitoids  | Weighted nestedness  | 0.853    | -0.382 | -0.636   | 0.226    | Higher | 4.316  |
|              | Linkage density      | 3.238    | 3.525  | 3.438    | 3.589    | Lower  | -5.456 |
|              | Weighted connectance | 0.404    | 0.440  | 0.429    | 0.448    | Lower  | -5.456 |
|              | Interaction evenness | 0.889    | 0.914  | 0.888    | 0.936    | ns     | -1.612 |
| Predators    | Weighted nestedness  | 0.165    | -0.634 | -0.841   | -0.465   | Higher | 7.020  |
|              | Linkage density      | 3.105    | 3.475  | 3.362    | 3.568    | Lower  | -5.368 |
|              | Weighted connectance | 0.388    | 0.434  | 0.420    | 0.446    | Lower  | -5.368 |
|              | Interaction evenness | 0.822    | 0.903  | 0.870    | 0.926    | Lower  | -4.547 |
